# Supplementary material
Source: PubMed Central journal article supplement (PMC6109911)
Supplement: supp_RA117.001388_134562_2_supp_141758_p93cx9.pdf [file supp_RA117.001388_134562_2_supp_141758_p93cx9.pdf]

## Supplementary information

A novel flow cytometry interaction assay reveals the formation of isoform- and cell type-specific Apolipoprotein E-amyloid beta complexes in vitro

Eleanna Kara\*, Jordan D Marks\*, Allyson D Roe#, Caitlin Commins#, Zhanyun Fan, Maria Calvo-Rodriguez, Susanne Wegmann, Eloise Hudry, Bradley T Hyman<sup>§</sup>

**Supplementary table 1: Concentrations of ApoE and A $\beta$  used in the experiments as determined by ELISA.** For ApoE and CHO-secreted A $\beta$  three independent measurements were performed. The concentrations of synthetic A $\beta$  were not measured by ELISA, but were determined through the dilution of a stock solution with a known concentration. A single batch of Tg2576 conditioned medium was used for the experiments, therefore ELISA measurements were performed on technical replicates from that batch, and the concentrations of each were averaged.

|                       | Stock concentrations (nmol/L) |          | Final concentrations (nmol/L) |          |
|-----------------------|-------------------------------|----------|-------------------------------|----------|
|                       | mean                          | SD       | mean                          | SD       |
| <b>HEK ApoE</b>       |                               |          |                               |          |
| <b>E2</b>             | 71,38588566                   | 8,086465 | 53,53941                      | 6,064848 |
| <b>E3</b>             | 70,89108827                   | 11,37235 | 53,16832                      | 8,529265 |
| <b>E4</b>             | 35,23146089                   | 20,46795 | 26,4236                       | 15,35096 |
| <b>Astrocyte ApoE</b> |                               |          |                               |          |
| <b>E2</b>             | 20,06834517                   | 0,83755  | 15,05126                      | 0,628162 |
| <b>E3</b>             | 11,87246938                   | 2,42198  | 8,904352                      | 1,816485 |
| <b>E4</b>             | 7,280623566                   | 1,712784 | 5,460468                      | 1,284588 |
| <b>synthetic Ab42</b> | 221,5281008                   | NA       | 6,645843                      | NA       |
| <b>synthetic Ab40</b> | 221,5281008                   | NA       | 6,645843                      | NA       |
| <b>Tg2576</b>         | 5                             | NA       | 1,25                          | NA       |
| <b>7w Ab42</b>        | 0,009202256                   | 0,006287 | 0,002301                      | 0,001572 |
| <b>7w Ab40</b>        | 0,3886385                     | 0,534358 | 0,09716                       | 0,13359  |
| <b>7PA2 Ab42</b>      | 0,902284849                   | 0,772533 | 0,225571                      | 0,193133 |
| <b>7PA2 Ab40</b>      | 9,122778677                   | 11,75813 | 2,280695                      | 2,939531 |

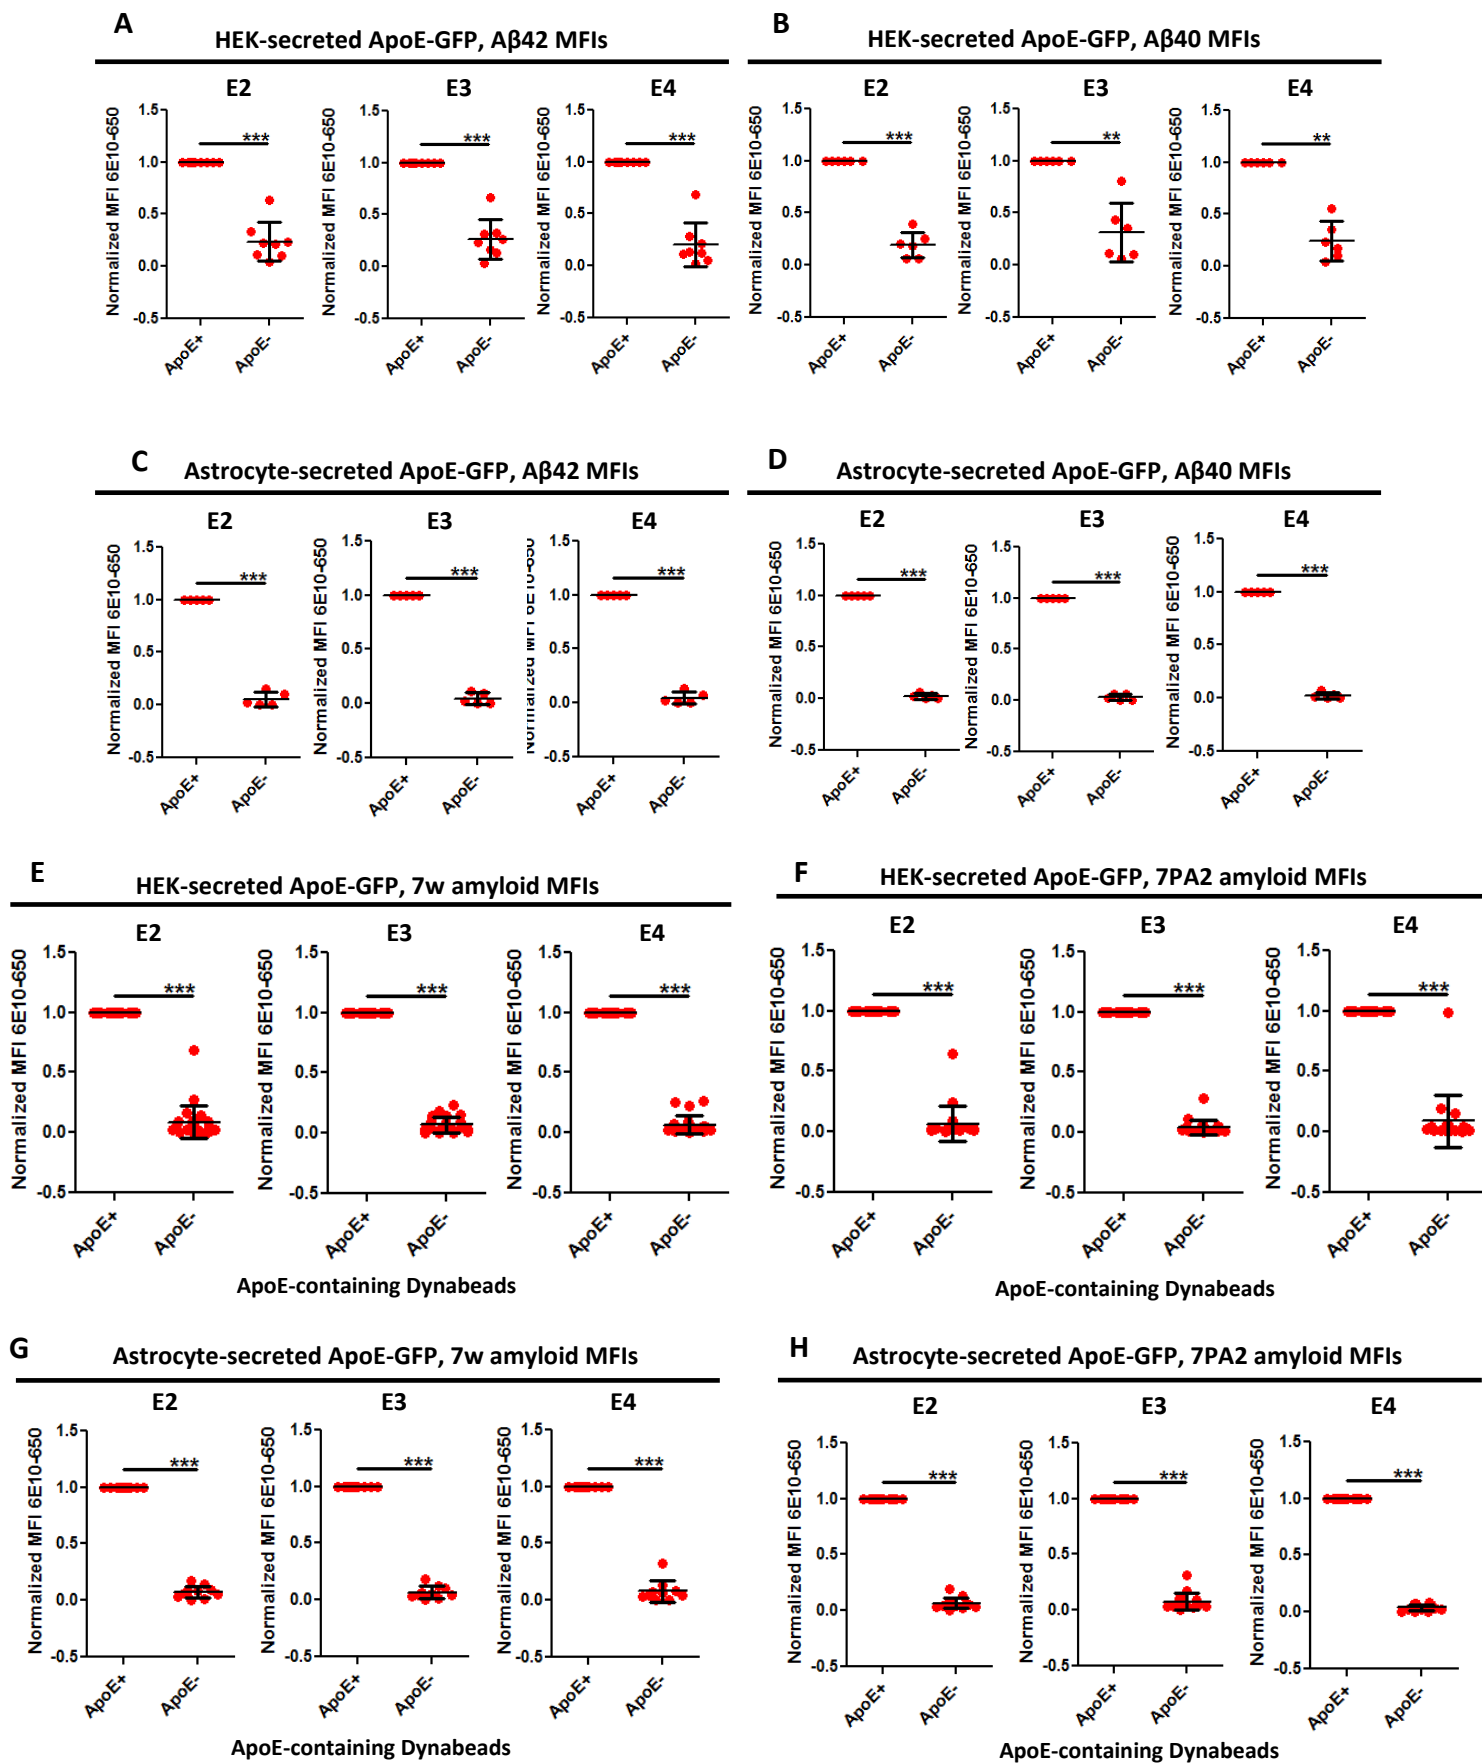

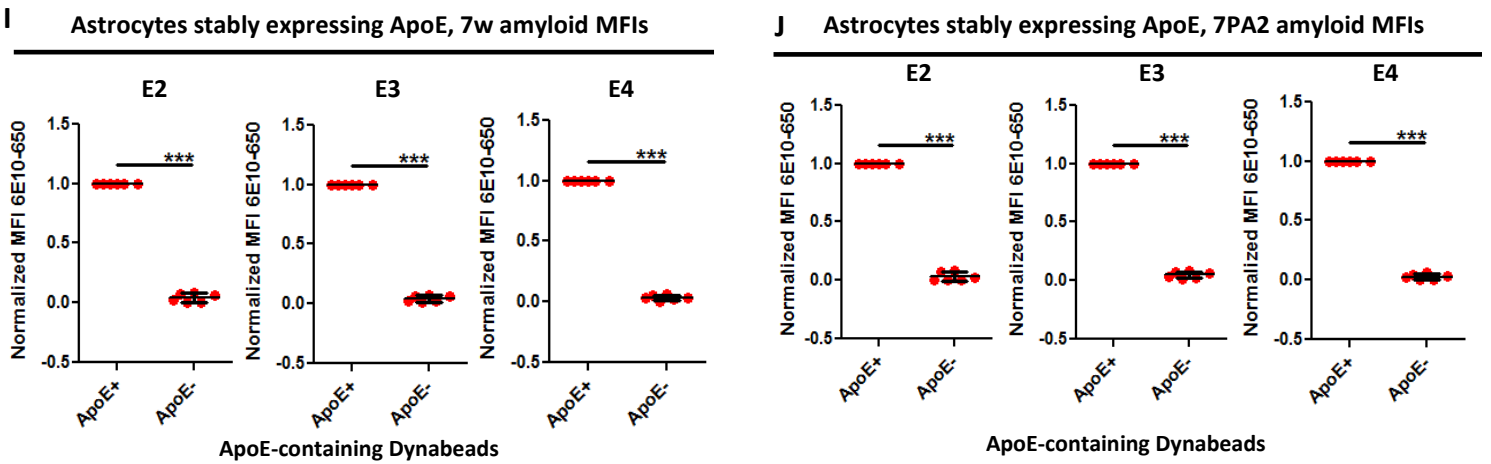

**Supplementary Figure 1 (continued from page S-2):**

**A-D.** Normalized MFI levels of the 647Hilyte-A $\beta$ 42 and 647Hilyte-A $\beta$ 40 in ApoE+ and ApoE- populations in HEK- and astrocyte-secreted ApoE. In all samples, the ApoE+ population had significantly higher 647Hilyte MFI in comparison to the ApoE- population. Number of independent experiments for both synthetic A $\beta$ 42 and A $\beta$ 40: E2: 5; E3: 5; E4: 5.

**E.** Normalized MFI levels of the 650Dylight-6E10 in ApoE+ vs ApoE- Dynabead populations for HEK-secreted ApoE samples incubated with 7w A $\beta$ , indicating the presence of a significant interaction. Number of independent experiments: E2: 24; E3: 24; E4: 23.

**F.** Normalized MFI levels of the 650Dylight-6E10 in ApoE+ vs ApoE- Dynabead populations for HEK-secreted ApoE samples incubated with 7PA2 A $\beta$  shows a significant interaction. Number of independent experiments: E2: 20; E3: 20; E4: 20; A $\beta$ 42-E3-GFP: 5.

**G.** Normalized MFI levels of the 650Dylight-6E10 in ApoE+ vs ApoE- Dynabead populations for astrocyte-secreted ApoE samples incubated with 7w A $\beta$  indicating the presence of a significant interaction. Number of independent experiments: E2: 10; E3: 10; E4: 10.

**H.** Normalized MFI levels of the 650Dylight-6E10 in ApoE+ vs ApoE- Dynabead populations for astrocyte-secreted ApoE samples incubated with 7PA2 A $\beta$  indicating the presence of a significant interaction. Number of independent experiments: E2: 16; E3: 16; E4: 16.

**I.** Normalized MFI levels of the 650Dylight-6E10 in ApoE+ vs ApoE- Dynabead populations for astrocyte-secreted untagged ApoE samples incubated with 7w A $\beta$ . Number of independent experiments: E2: 6; E3: 6; E4: 6.

**J.** Normalized MFI levels of the 650Dylight-6E10 in ApoE+ vs ApoE- Dynabead populations for astrocyte-secreted untagged ApoE samples incubated with 7PA2 A $\beta$ . Number of independent experiments: E2: 6; E3: 6; E4: 6.

The asterisks on the graph indicate  $P$  values as follows: \*\*\*  $P \leq 0.001$ ; \*\*  $P \leq 0.01$ .

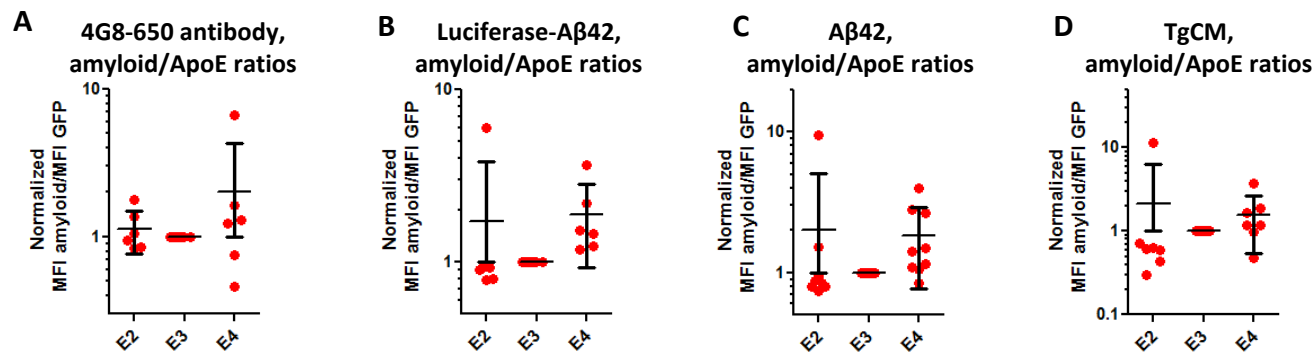

**E** Capture of amyloid on Dynabeads

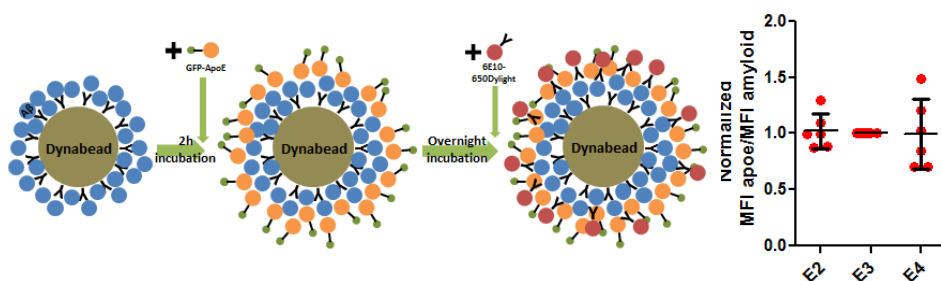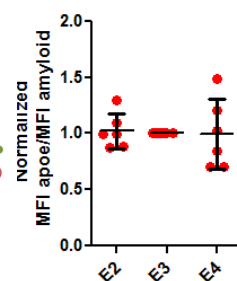

**F**

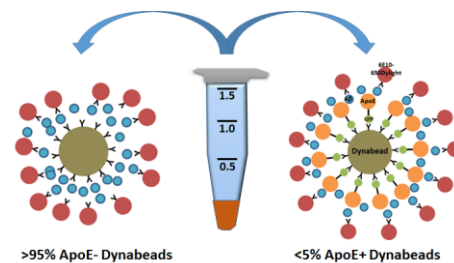

**Amyloid and amyloid antibody (6E10) Gradients in the absence of ApoE**

**G** ApoE Gradient

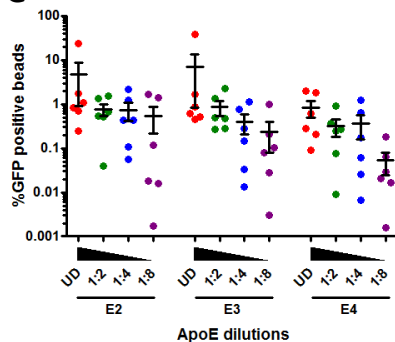

**H** Anti-ApoE-594Dylight

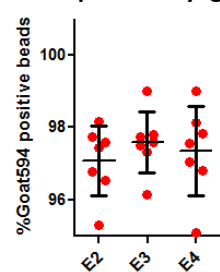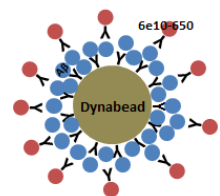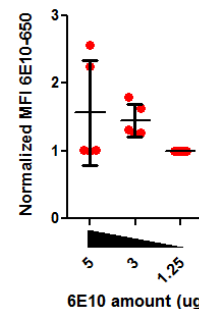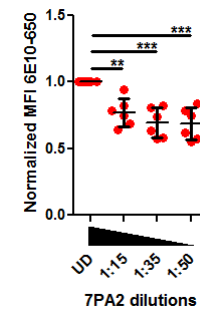

**J** Amyloid and amyloid antibody (6E10) Gradients in the presence of ApoE

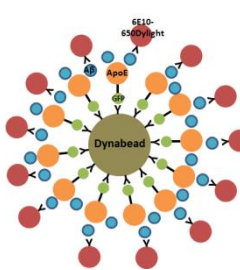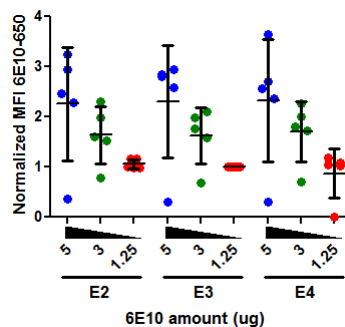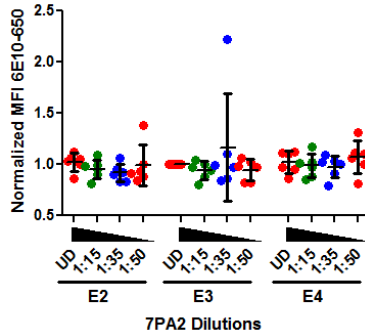

**K** Recombinant E3 coated Dynabeads

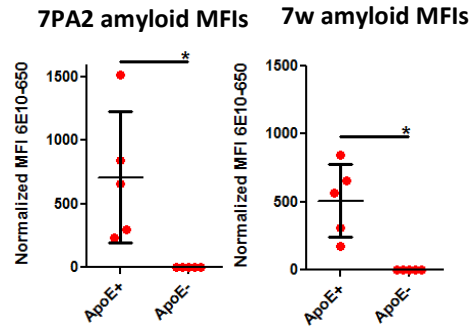

**L** 6E10 antibody titration assays

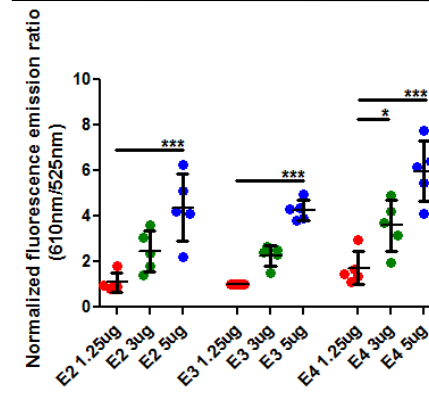

**Supplementary figure 2 (previous page): Interactions between ApoE and A $\beta$  can be detected robustly and specifically by flow cytometry.**

- A. Plot indicating the A $\beta$ /ApoE ratios for HEK-secreted ApoE incubated with 7PA2 CM. A $\beta$  was detected by using the 4G8-650 antibody. There are no statistically significant differences between isoforms, though E4 has a trend for stronger interaction with A $\beta$  compared to E2 and E3. Number of independent experiments: E2: 6; E3: 6; E4: 6.
- B. Plot indicating the A $\beta$ /ApoE ratios for HEK-secreted ApoE incubated with luciferase- A $\beta$ 42 CM generated after transfection of HEK cells. A $\beta$  was detected using an anti-luciferase antibody tagged with 650Dylight. E4 has a trend to interact more strongly than E2 and E3 with A $\beta$ . Number of independent experiments: E2: 6; E3: 6; E4: 6.
- C. Plot indicating the A $\beta$ /ApoE ratios for HEK-secreted ApoE incubated with A $\beta$ 42 in CM from HEK cells that were transfected with a plasmid encoding pure A $\beta$ 42. E4 has a trend to interact more strongly than E2 and E3 with A $\beta$ . Number of independent experiments: E2: 8; E3: 9; E4: 9.
- D. Plot indicating the A $\beta$ /ApoE ratios for HEK-secreted ApoE incubated with transgenic CM (TgCM) from primary neurons generated from transgenic mice expressing the APP Swedish mutation. There are no statistically significant differences between the isoforms. Number of independent experiments: E2: 7; E3: 7; E4: 7.
- E. A $\beta$  was captured on Dynabeads using the 4G8 antibody. 2h later, HEK-secreted ApoE-GFP was added to each sample for overnight incubation. The following day, the A $\beta$  was detected by using the 6E10-650 antibody. The plot showing the A $\beta$ /ApoE ratios suggests that there are no statistically significant differences between isoforms.
- F. Cartoon explaining that less than 5% of Dynabeads were positive for ApoE and more than 95% were negative for ApoE; therefore, the ApoE-negative population was used as an internal negative control in the assay.
- G. Plot indicating the percentage of ApoE+ Dynabeads in various concentrations of ApoE secreted by HEK cells. The percentage of ApoE+ beads decreases proportionately to the concentration of ApoE. Number of independent experiments: E2: 6; E3: 6; E4: 6.
- H. Plot indicating the percentage of Dynabeads that are positive for the goat anti-ApoE antibody that was conjugated to 594Dylight. Approximately 97% of dynabeads were positive for antibody binding. Number of independent experiments: E2: 7; E3: 7; E4: 7.
- I. 7PA2 A $\beta$  was attached to dynabeads using the 4G8 antibody overnight, following by detection of the A $\beta$  with the 6e10-650 antibody the following day. When a serial dilution of A $\beta$  and a stable concentration of 6E10-650 antibody were used, the 650MFI was proportionate to the decrease in concentration of A $\beta$ . When a stable concentration of A $\beta$  and a concentration gradient of 6E10-650 were used, the 650MFI was proportionate to the amount of the antibody. Number of independent experiments: 7PA2 gradient: 6; 6E10 gradient: 5.
- J. HEK-secreted ApoE-GFP was attached to dynabeads using an anti-GFP antibody. 2h later, 7PA2 A $\beta$  was added to the sample for overnight incubation. The following day, the A $\beta$  was detected by using the 6e10-650 antibody. When a concentration gradient of A $\beta$  and a stable concentration of 6E10 antibody were used, the results differed from the equivalent experiment without ApoE. When the concentration of A $\beta$  was stable and the concentration of 6E10-650 antibody followed a gradient, the results were identical to the experiment where there was no ApoE present. Number of independent experiments: 7PA2 gradient: 6; 6E10 gradient: 5.
- K. Plots indicating the 650MFI in ApoE+ and ApoE- populations when recombinant E3 was incubated with 7PA2 or 7w A $\beta$ . Both plots indicate the presence of a mild interaction between recombinant E3 and A $\beta$ . Number of independent experiments: 7w: 5; 7PA2: 5.
- L. Antibody titration assays were performed in order to determine the minimum concentration of the 6E10 antibody that is suitable for the assay.

In these plots, each dot represents the mean value from one independent experiment. The data was normalized to E3 or to ApoE- before metaanalysis (apart from panel G). Statistical analysis was done with 1 way ANOVA with Tukey's post-hoc correction. Mean $\pm$ -SD are shown on the plots. The asterisks on the graph indicate  $P$  values as follows: \*\*\*  $P \leq 0.001$ ; \*\*  $P \leq 0.01$ ; \*  $P \leq 0.05$ ;

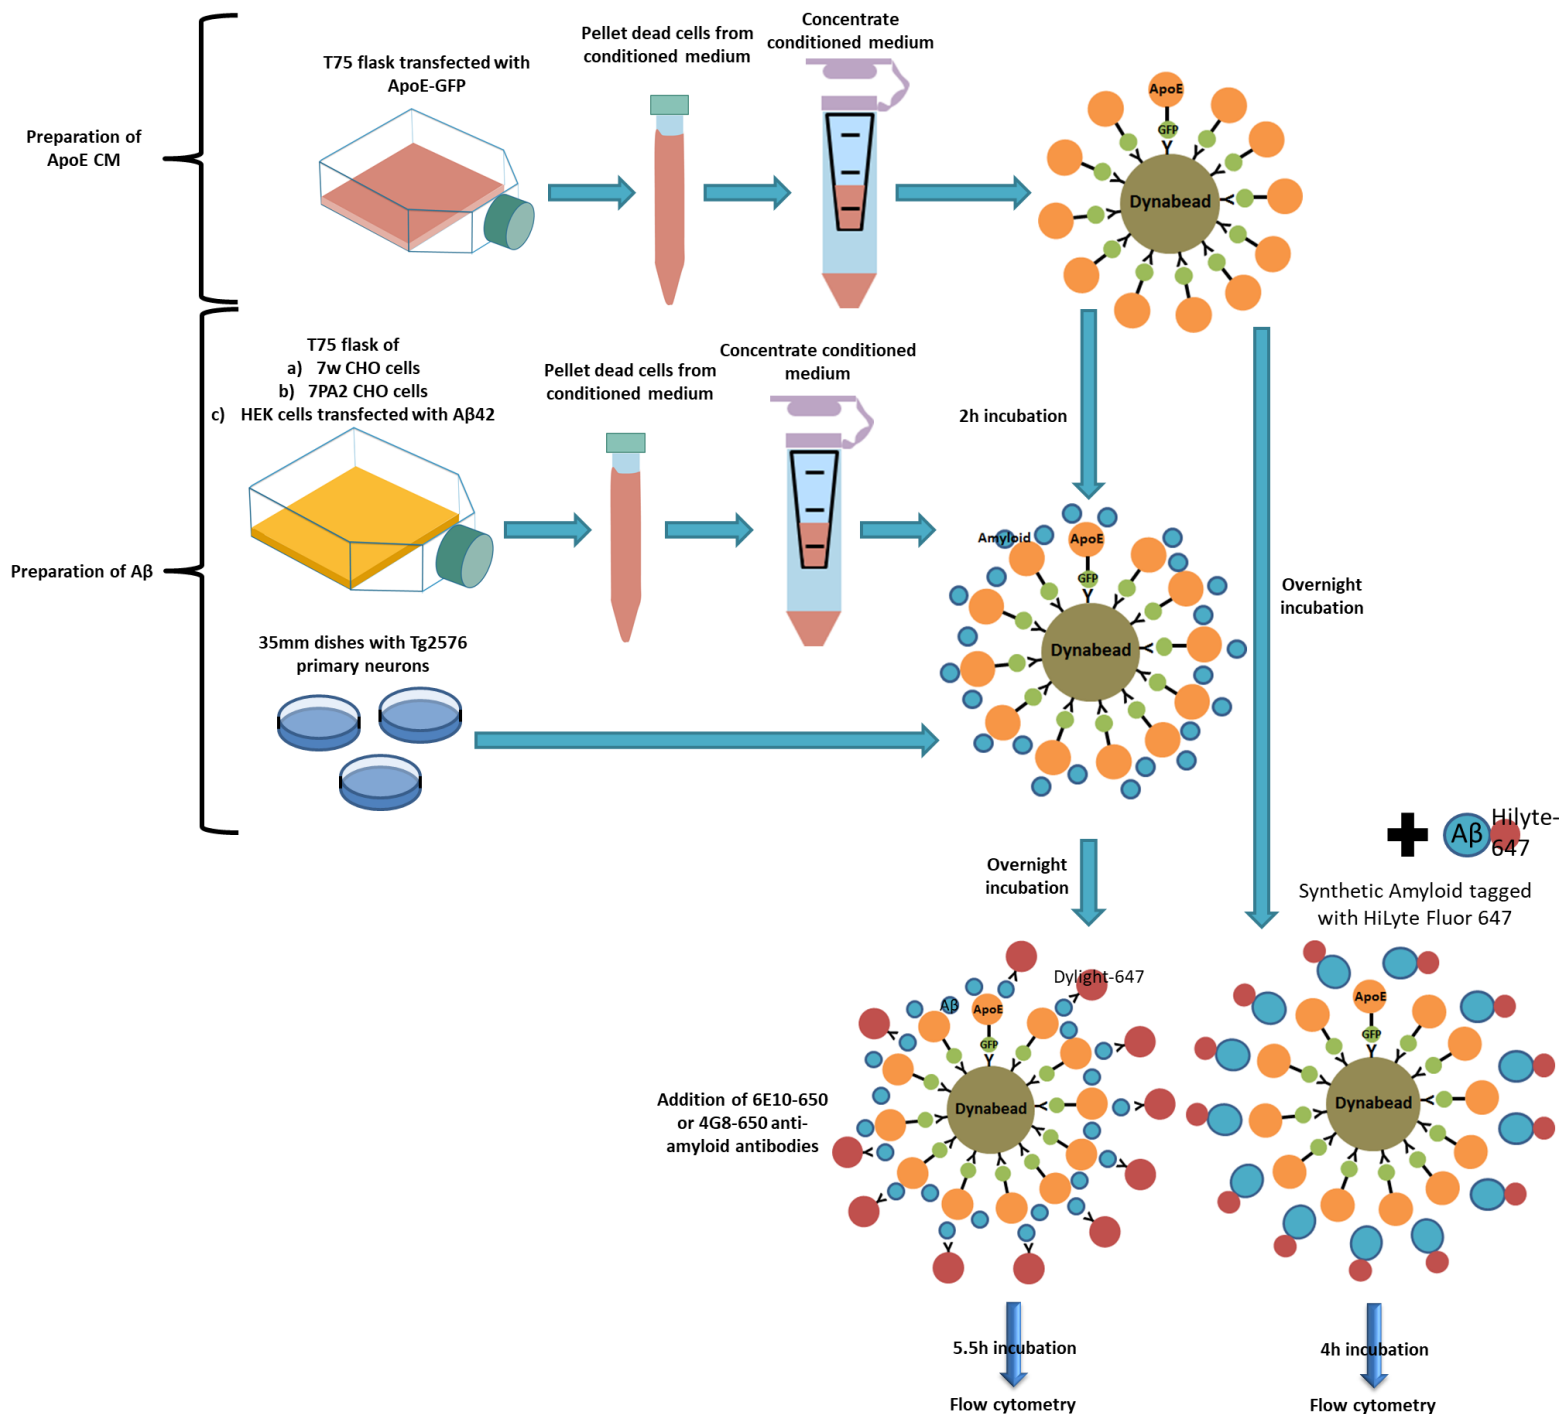

**Supplementary figure 3: Illustration summarizing the workflow of the experiments.** Conditioned media from cells transfected with ApoE-GFP was concentrated 15-fold, and ApoE-GFP was attached to Dynabeads with a GFP antibody. Aβ from a variety of sources was used: synthetic tagged with a far red fluorophore, 15-fold concentrated conditioned media of 7w or 7PA2 CHO cells or HEK cells transfected with Aβ42, or conditioned media from Tg2576 primary neurons expressing the APP Swedish mutation. 2 hours after addition of ApoE to Dynabeads, physiological Aβ was added and the sample was incubated at 4°C overnight with rotation. The next morning, the 6e10 or 4G8 anti-amyloid antibodies were added to the mix and incubated for 5.5 hours before flow cytometry. In the case of synthetic Aβ, this was added to the ApoE-GFP+Dynabeads for 4h after overnight incubation, followed by analysis through flow cytometry.
